# Supplementary material for: Metabolomic analysis of low and high biofilm-forming Helicobacter pylori strains
Source: PubMed Central journal article supplement (PMC5780479; doi:10.1038/s41598-018-19697-0), 2018-01-23
Supplement: 41598_2018_19697_MOESM1_ESM.pdf [file 41598_2018_19697_MOESM1_ESM.pdf]

**Metabolomic analysis of low and high biofilm-forming**  
***Helicobacter pylori* strains**

Eric Hong Jian Wong<sup>1</sup>, Chow Goon Ng<sup>2</sup>, Khean Lee Goh<sup>3</sup>, Jamuna Vadivelu<sup>1\*</sup>, Bow Ho<sup>2#a</sup> and Mun Fai Loke<sup>1,2\*</sup>

<sup>1</sup>Helicobacter Research Laboratory, Department of Medical Microbiology, Faculty of Medicine, University of Malaya, Kuala Lumpur, Malaysia.

<sup>2</sup>Department of Microbiology and Immunology, Yong Loo Lin School of Medicine, National University of Singapore, Singapore.

<sup>3</sup>Department of Medicine, Faculty of Medicine, University of Malaya, Kuala Lumpur, Malaysia.

\*These authors contributed equally to this work.

#Current address:

<sup>a</sup>Singapore Precision Medicine Centre PTE LTD, Singapore, Singapore.

**Corresponding authors:**

jamuna@ummc.edu.my (JV); lmunfai@gmail.com (MFL)

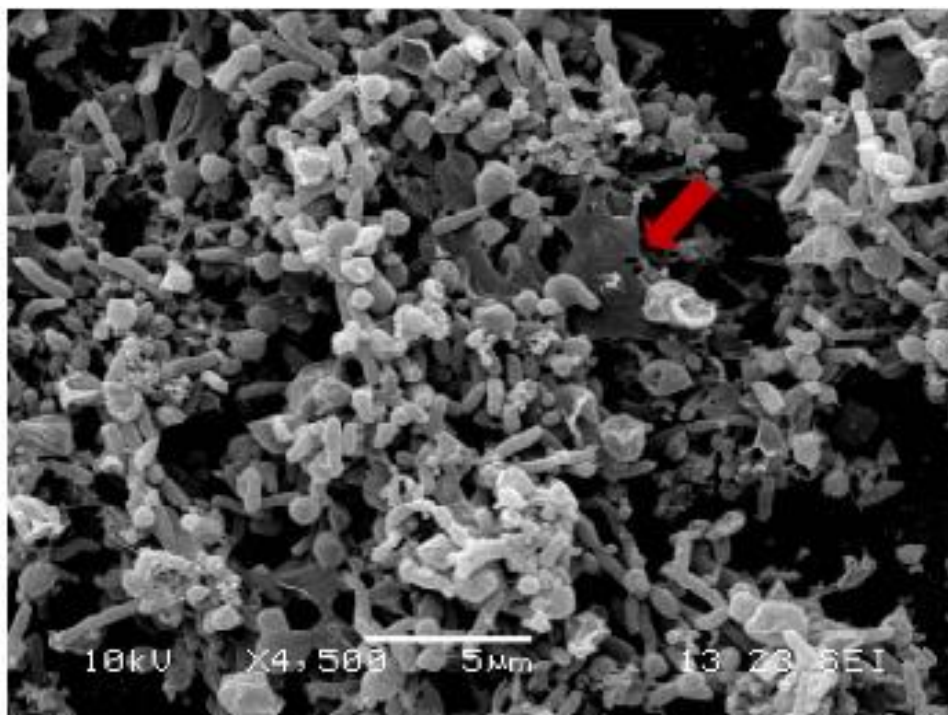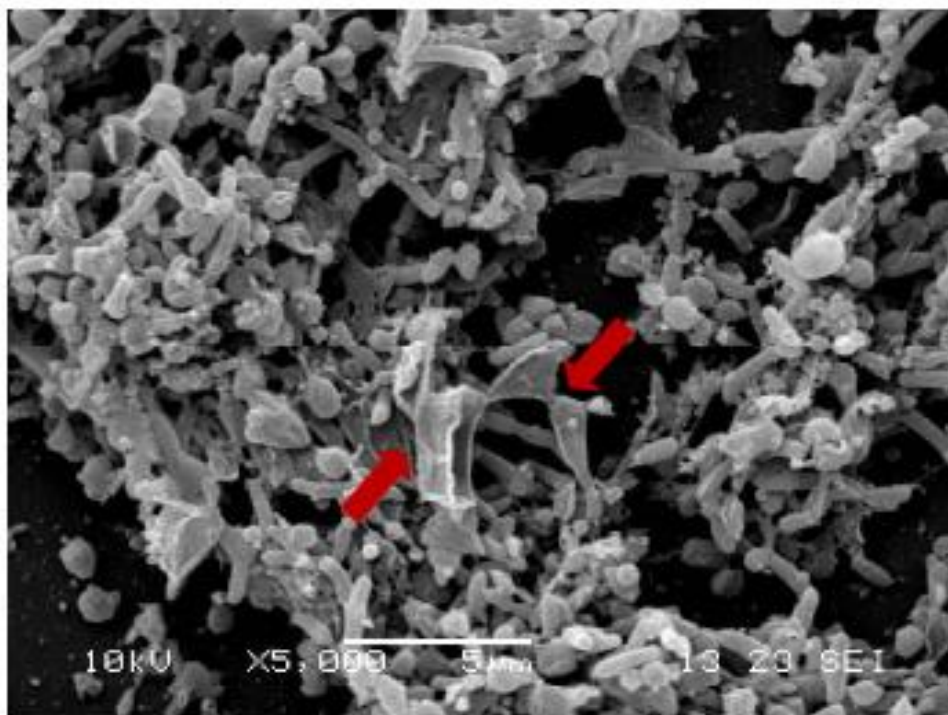

**Supplementary materials Figure S1.**

Representative scanning electron micrographs of 3 days old biofilm of a high biofilm former. *H. pylori* biofilm was grown on a glass cover slip at the air-medium interface. A mixture of spiral and coccoid forms was observed even as early as on day 3. Exopolysaccharide of biofilm can be seen as sheet-like structures (red arrow).

**Suppl. Table S2.**Lipid metabolites increased in low biofilm-forming *H. pylori* strains.

| Compound                                                                                  | p-value  | Mean (HBF) | Mean (LBF) | FC     | LMP ID       | Category                  | Class                              |
|-------------------------------------------------------------------------------------------|----------|------------|------------|--------|--------------|---------------------------|------------------------------------|
| 3,11-dihydroxy myristic acid                                                              | 1.49E-20 | 593        | 27910      | 47.07  | LMFA01050081 | Fatty Acyls [FA]          | Fatty Acids and Conjugates [FA01]  |
| Decanoic acid, 9-hydroxy-, (R)-; (-)-(R)-9-Hydroxydecanoic acid; D-9-Hydroxydecanoic acid | 3.99E-15 | 713        | 31781      | 44.60  | LMFA01050247 | Fatty Acyls [FA]          | Fatty Acids and Conjugates [FA01]  |
| 11-hydroxy-tetradecanoic acid                                                             | 3.14E-13 | 1146       | 352320     | 307.55 | LMFA01050174 | Fatty Acyls [FA]          | Fatty Acids and Conjugates [FA01]  |
| 2-O-(beta-D-galactopyranosyl-(1-6)-beta-D-galactopyranosyl) 2S-hydroxytridecanoic acid    | 7.36E-18 | 0          | 58832      | NA     | LMFA13010048 | Fatty Acyls [FA]          | Fatty acyl glycosides [FA13]       |
| 12S-HpOME(13E)                                                                            | 1.27E-17 | 500        | 32425      | 64.91  | LMFA02000071 | Fatty Acyls [FA]          | Octadecanoids [FA02]               |
| N-docosahexaenoyl histidine                                                               | 2.57E-10 | 89598      | 1834555    | 20.48  | LMFA08020134 | Fatty Acyls [FA]          | Fatty amides [FA08]                |
| 1-hexadecanyl-2-((2'-alpha-glucosyl)-beta-glucosyl)-3-beta-xylosyl-sn-glycerol + 9.871498 | 1.12E-11 | 72544      | 744020     | 10.26  | LMGL04010001 | Glycerolipids [GL]        | Glycosylmonoradylglycerols [GL04]  |
| TG(22:3(10Z,13Z,16Z)/22:3(10Z,13Z,16Z)/22:3(10Z,13Z,16Z))                                 | 5.11E-07 | 59569      | 238254     | 4.00   | LMGL03012510 | Glycerolipids [GL]        | Triradylglycerols [GL03]           |
| PS(17:2(9Z,12Z)/20:4(5Z,8Z,11Z,14Z))                                                      | 0        | 0          | 993716     | NA     | LMGP03010300 | Glycerophospholipids [GP] | Glycerophosphoethanolamines [GP02] |
| PE(22:6(4Z,7Z,10Z,13Z,16Z,19Z)/22:6(4Z,7Z,10Z,13Z,16Z,19Z))                               | 7.22E-33 | 0          | 23280      | NA     | LMGP02010093 | Glycerophospholipids [GP] | Glycerophosphoethanolamines [GP02] |
| PE(17:0/0:0)                                                                              | 2.17E-24 | 0          | 168497     | NA     | LMGP02050030 | Glycerophospholipids [GP] | Glycerophosphoethanolamines [GP02] |
| PE(13:0/0:0)                                                                              | 7.06E-21 | 0          | 71731      | NA     | LMGP02050007 | Glycerophospholipids [GP] | Glycerophosphoethanolamines [GP02] |
| PE(19:0/0:0)                                                                              | 2.00E-17 | 0          | 299715     | NA     | LMGP02050028 | Glycerophospholipids [GP] | Glycerophosphoethanolamines [GP02] |
| PE(19:1(9Z)/0:0)                                                                          | 5.48E-12 | 60628      | 6771117    | 111.68 | LMGP02050019 | Glycerophospholipids [GP] | Glycerophosphoethanolamines [GP02] |
| PE(12:0/0:0)                                                                              | 2.26E-11 | 7055       | 318755     | 45.18  | LMGP02050005 | Glycerophospholipids [GP] | Glycerophosphoethanolamines [GP02] |
| PE(19:1(9Z)/0:0) + 20.293535                                                              | 3.04E-10 | 441943     | 16126673   | 36.49  | LMGP02050019 | Glycerophospholipids [GP] | Glycerophosphoethanolamines [GP02] |
| L-Phosphatidic acid                                                                       | 1.56E-32 | 68571      | 1513793    | 22.08  | -            | Glycerophospholipids [GP] | -                                  |
| PE(18:3(6Z,9Z,12Z)/22:6(4Z,7Z,10Z,13Z,16Z,19Z))<br>KEGG: C00350                           | 2.95E-25 | 0          | 272400     | NA     | -            | Glycerophospholipids [GP] | -                                  |
| PI(14:1(9Z)/16:1(9Z))                                                                     | 2.83E-25 | 0          | 726571     | NA     | LMGP06010083 | Glycerophospholipids [GP] | Glycerophosphoinositols [GP06]     |
| PI(O-16:0/0:0)                                                                            | 7.77E-18 | 0          | 37055      | NA     | LMGP06060003 | Glycerophospholipids [GP] | Glycerophosphoinositols [GP06]     |
| PI(12:0/12:0)                                                                             | 1.71E-14 | 3293       | 31002      | 9.42   | LMGP06010962 | Glycerophospholipids [GP] | Glycerophosphoinositols [GP06]     |
| GPIIns(12:0/13:0)                                                                         | 1.30E-08 | 585814     | 2061801    | 3.52   | LMGP06010003 | Glycerophospholipids [GP] | Glycerophosphoinositols [GP06]     |

PE(22:5(4Z,7Z,10Z,13Z,16Z)/22:5(7Z,10Z,13Z,16Z,19Z)) KEGG: C00350

1.83E-08 25422 75834 2.98 - Glycerophospholipids [GP] -

| Compound                                                      | p-value  | Mean (HBF) | Mean (LBF) | FC     | LMP ID        | Category                     | Class                          |
|---------------------------------------------------------------|----------|------------|------------|--------|---------------|------------------------------|--------------------------------|
| PE(22:5(4Z,7Z,10Z,13Z,16Z)/22:4(7Z,10Z,13Z,16Z)) KEGG: C00350 | 2.74E-07 | 40441      | 209646     | 5.18   | -             | Glycerophospholipids [GP]    | -                              |
| PI(18:0/19:0)                                                 | 9.31E-07 | 689744     | 1421660    | 2.06   | LMGP06010285  | Glycerophospholipids [GP]    | Glycerophosphoinositols [GP06] |
| PI(16:0/13:0)                                                 | 4.02E-07 | 2774287    | 6888244    | 2.48   | LMGP06010160  | Glycerophospholipids [GP]    | Glycerophosphoinositols [GP06] |
| CDP-DG(18:1(11Z)/22:3(10Z,13Z,16Z))                           | 2.67E-06 | 139250     | 501221     | 3.60   | -             | Glycerophospholipids [GP]    | -                              |
| PI(20:1(11Z)/0:0)                                             | 2.57E-06 | 1012742    | 4399133    | 4.34   | LMGP06050019  | Glycerophospholipids [GP]    | Glycerophosphoinositols [GP06] |
| PI(13:0/14:1(9Z))                                             | 2.06E-05 | 506672     | 1087936    | 2.15   | LMGP06010038  | Glycerophospholipids [GP]    | Glycerophosphoinositols [GP06] |
| PG(14:0/0:0)                                                  | 2.21E-13 | 1950       | 1162536    | 596.19 | LMGP04050012  | Glycerophospholipids [GP]    | Glycerophosphoglycerols [GP04] |
| GPGro(14:0/14:0)                                              | 2.02E-08 | 103685000  | 27848484   | 3.72   | LMGP04010005  | Glycerophospholipids [GP]    | Glycerophosphoglycerols [GP04] |
| 54:3 SLBPA                                                    | 4.13E-07 | 10372      | 53881      | 5.19   | LMGP04090002  | Glycerophospholipids [GP]    | Glycerophosphoglycerols [GP04] |
| PA(P-16:0/17:2(9Z,12Z))                                       | 2.54E-17 | 14966      | 108881     | 7.28   | LMGP10030011  | Glycerophospholipids [GP]    | Glycerophosphates [GP10]       |
| PA(18:4(6Z,9Z,12Z,15Z)/15:1(9Z))                              | 1.62E-09 | 39380      | 117197     | 2.98   | LMGP10010428  | Glycerophospholipids [GP]    | Glycerophosphates [GP10]       |
| PI(18:2(9Z,12Z)/18:1(9Z)) KEGG: C00626                        | 6.58E-09 | 8723       | 49087      | 5.63   | -             | Phosphatidylglycerides       | -                              |
| PIP(18:0/20:3(8Z,11Z,14Z)) KEGG: C00626                       | 2.52E-07 | 2382962    | 6862759    | 2.88   | -             | Phosphatidylglycerides       | -                              |
| LysoPE(0:0/18:0)                                              | 3.75E-14 | 0          | 937012     | NA     | -             | Lysophosphatidylethanolamine | -                              |
| LysoPE(0:0/18:0) - 20.73061                                   | 3.95E-14 | 0          | 770976     | NA     | -             | Lysophosphatidylethanolamine | -                              |
| LysoPE(0:0/14:0)                                              | 3.36E-09 | 111831     | 3358233    | 30.03  | -             | Lysophosphatidylethanolamine | -                              |
| Eruberin A                                                    | 0        | 0          | 95856      | NA     | LMPK12020167  | Polyketides [PK]             | Flavonoids [PK12]              |
| 4,5-Di-O-methyl-8-prenylafzelechin-4beta-ol + 16.009428       | 3.40E-27 | 1535       | 1028453    | 669.96 | LMPK12020217  | Polyketides [PK]             | Flavonoids [PK12]              |
| 4,5-Di-O-methyl-8-prenylafzelechin-4beta-ol                   | 3.62E-15 | 4170650    | 14086948   | 3.38   | LMPK12020217  | Polyketides [PK]             | Flavonoids [PK12]              |
| Myrtucommulone A                                              | 3.92E-14 | 60446      | 230844     | 3.82   | LMPK13070001  | Polyketides [PK]             | Aromatic polyketides [PK13]    |
| Oleandomycin 2'-O-phosphate KEGG: C03796                      | 2.83E-05 | 47528      | 202516     | 4.26   | -             | Polyketides [PK]             | -                              |
| (+)-Mayurone                                                  | 1.73E-07 | 549632     | 1977529    | 3.60   | LMPRO10386002 | Prenol Lipids [PR]           | Isoprenoids [PR01]             |
| (S)-beta-himachalene                                          | 1.55E-06 | 8470       | 61145      | 7.22   | LMPRO10348006 | Prenol Lipids [PR]           | Isoprenoids [PR01]             |
| 7,8-Didehydroastaxanthin                                      | 4.37E-04 | 32395      | 86073      | 2.66   | LMPRO1070051  | Prenol Lipids [PR]           | Isoprenoids [PR01]             |

|                 |           |   |       |    |              |                    |                                  |
|-----------------|-----------|---|-------|----|--------------|--------------------|----------------------------------|
| C20-OHSulfatide | 33.27E-25 | 0 | 22787 | NA | LMSP06020005 | Sphingolipids [SP] | Acidic glycosphingolipids [SP06] |
| C18 Sulfatide   | 7.49E-21  | 0 | 31701 | NA | LMSP06020001 | Sphingolipids [SP] | Acidic glycosphingolipids [SP06] |

| Compound                                                                                                                       | p-value  | Mean (HBF) | Mean (LBF) | FC    | LMP ID       | Category           | Class                             |
|--------------------------------------------------------------------------------------------------------------------------------|----------|------------|------------|-------|--------------|--------------------|-----------------------------------|
| C17 Sphinganine-1-phosphate                                                                                                    | 5.69E-21 | 6105       | 133243     | 21.83 | LMSP01050008 | Sphingolipids [SP] | Sphingoid bases [SP01]            |
| CerP(d18:1/2:0)                                                                                                                | 1.50E-11 | 2020975    | 10411116   | 5.15  | LMSP02050014 | Sphingolipids [SP] | Ceramides [SP02]                  |
| N-(3E-hexadecenoyl)-deoxysphing-4-enine-1-sulfonate                                                                            | 4.71E-08 | 4598       | 31874      | 6.93  | LMSP00000003 | Sphingolipids [SP] | Other Sphingolipids [SP00]        |
| GalNAcalpha1-3(Fucalpha1-2)Galbeta1-3GlcNAcbeta1-3(GlcNAcbeta1-6)Galbeta1-3GlcNAcbeta1-3Galbeta1-4Glcbeta-Cer(d18:1/24:1(15Z)) | 4.77E-06 | 24778      | 82298      | 3.32  | LMSP0504BF07 | Sphingolipids [SP] | Neutral glycosphingolipids [SP05] |
| Galbeta1-4(Fucalpha1-3)GlcNAcbeta1-3Galbeta1-3(Fucalpha1-4)GlcNAcbeta1-3Galbeta1-4Glcbeta-Cer(d18:1/26:0)                      | 3.29E-06 | 108831     | 339724     | 3.12  | LMSP0504BC06 | Sphingolipids [SP] | Neutral glycosphingolipids [SP05] |
| Trilengenin                                                                                                                    | 6.66E-33 | 0          | 408589     | NA    | LMST01080047 | Sterol Lipids [ST] | Sterols [ST01]                    |
| (25S)-11alpha,20,26-trihydroxyecdysone                                                                                         | 2.28E-17 | 50191      | 443781     | 8.84  | LMST01010158 | Sterol Lipids [ST] | Sterols [ST01]                    |
| 3-O-(Rhaa1-3Glc1-2(Xylb1-3)Glc1-4Galb)-(25R)-5alpha-spirostan-3beta-ol                                                         | 2.62E-04 | 240761     | 705792     | 2.93  | LMST01080074 | Sterol Lipids [ST] | Sterols [ST01]                    |
| (24S)-1alpha,24-dihydroxy-22-oxa-20-epivitamin D3                                                                              | 7.43E-25 | 0          | 267100     | NA    | LMST03020059 | Sterol Lipids [ST] | Secosteroids [ST03]               |
| 16-Glutaryloxy-1alpha,25-dihydroxyvitamin D3                                                                                   | 4.87E-20 | 0          | 3201782    | NA    | LMST03020634 | Sterol Lipids [ST] | Secosteroids [ST03]               |
| 24-(dimethoxyphosphoryl)-25,26,27-trinorvitamin D3                                                                             | 1.08E-14 | 3798       | 179072     | 47.15 | LMST03020072 | Sterol Lipids [ST] | Secosteroids [ST03]               |
| (22E)-26,26,26,27,27,27-hexafluoro-1alpha,25-dihydroxy-22,23-didehydrovitamin D3                                               | 1.71E-06 | 109708     | 265586     | 2.42  | LMST03020082 | Sterol Lipids [ST] | Secosteroids [ST03]               |
| (23S)-23,25-dihydroxy-24-oxovitamin D3 23-(beta-glucuronide)                                                                   | 1.58E-14 | 6387       | 140974     | 22.07 | LMST05010020 | Sterol Lipids [ST] | Steroid conjugates [ST05]         |
| Glycocholic acid 3-glucuronide                                                                                                 | 8.95E-07 | 162523     | 496587     | 3.06  | LMST05010023 | Sterol Lipids [ST] | Steroid conjugates [ST05]         |
| Cholic acid glucuronide                                                                                                        | 2.43E-05 | 4789619    | 9957613    | 2.08  | LMST05010044 | Sterol Lipids [ST] | Steroid conjugates [ST05]         |
| Ganglioside GM1 (d18:0/14:0)                                                                                                   | 2.94E-25 | 53854      | 902019     | 16.75 | -            | Glycosphingolipid  | -                                 |

FC: fold change; HBF: high biofilm-formers; LBF: low biofilm-formers; NA: Not applicable  
1: below detection limit; MPP sets the lowest intensity to 1 for the purpose of calculating p-value  
KEGG: Kyoto Encyclopedia of Genes and Genomes; HMP: Human Microbiome Project; LMP: LIPID MAPS Lipidomics
